# Supplementary material for: De novo characterization of the Anthurium transcriptome and analysis of its digital gene expression under cold stress
Source: PubMed Central journal article supplement (PMC4046746; doi:10.1186/1471-2164-14-827), 2013-11-25
Supplement: 12864_2013_5516_MOESM3_ESM.pdf [file 12864_2013_5516_MOESM3_ESM.pdf]

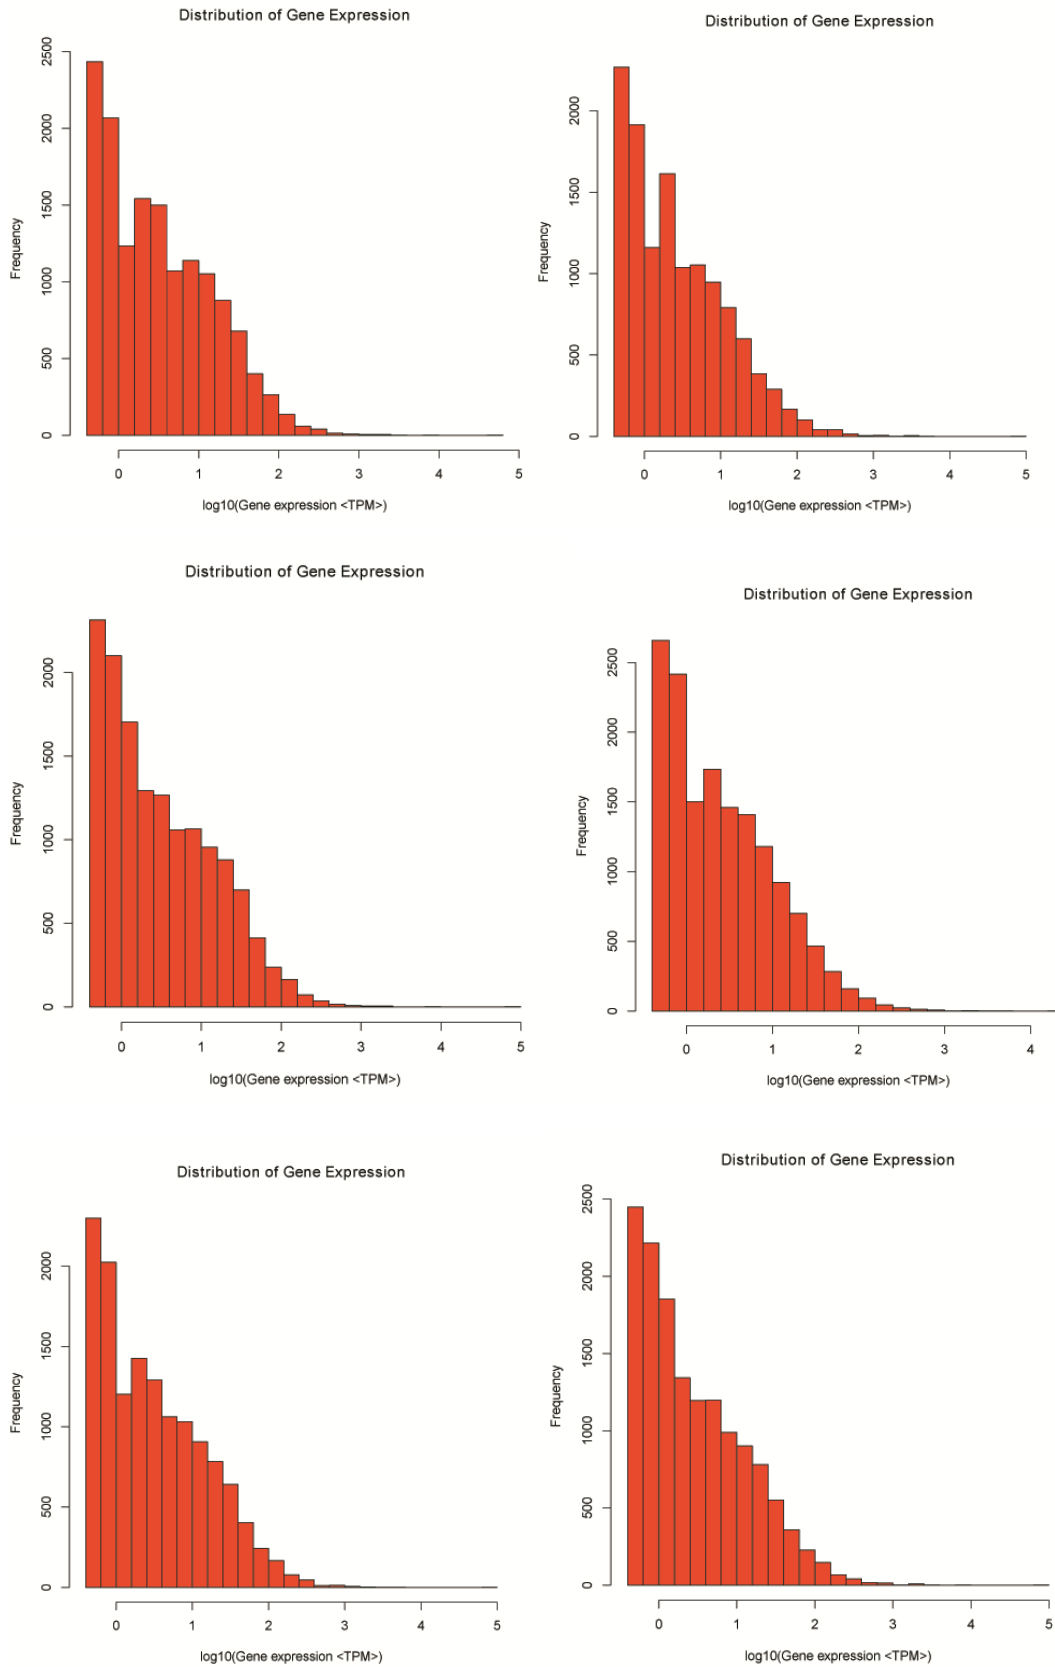

Figure. The gene expression level. TPM (Transcripts Per Million clean tags) is a standardized indicator, pointing out number of transcript copies in every 1 million clean tags. The number of unambiguous clean tags for each gene was calculated and then normalized to TPM.
