# Supplementary material for: De novo characterization of the Anthurium transcriptome and analysis of its digital gene expression under cold stress
Source: PubMed Central journal article supplement (PMC4046746; doi:10.1186/1471-2164-14-827), 2013-11-25

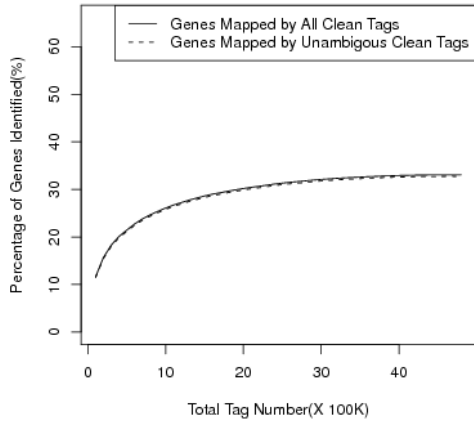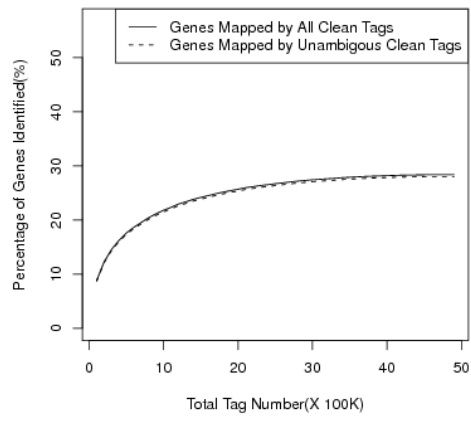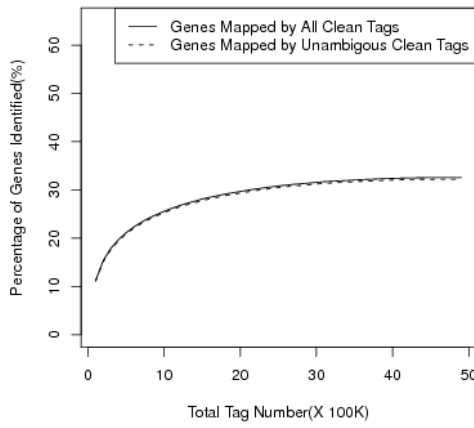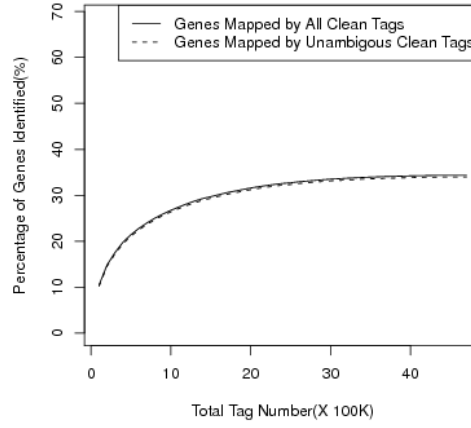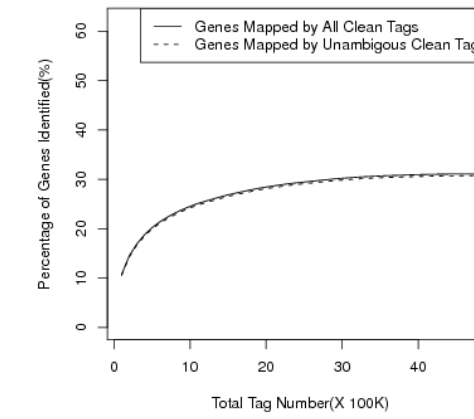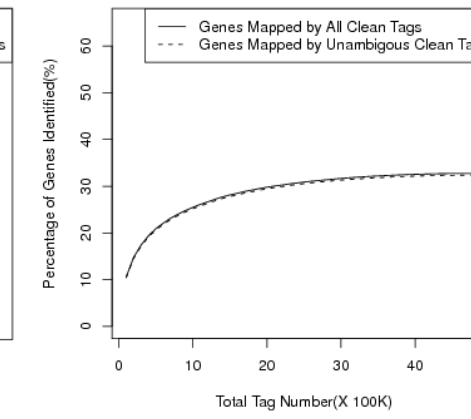

Supplement: 12864_2013_5516_MOESM7_ESM.pdf [file 12864_2013_5516_MOESM7_ESM.pdf]
