# Supplementary material for: De novo characterization of the Anthurium transcriptome and analysis of its digital gene expression under cold stress
Source: BMC Genomics. 2013 Nov 25;14(1):827. doi: 10.1186/1471-2164-14-827 (PMC4046746; doi:10.1186/1471-2164-14-827)
Supplement: Supplementary file 8 — Additional file 8: Significantly enriched pathways by 1-h cold stress in Anthurium. (A) Significantly enriched pathways of differentially expressed genes by 1-h cold stress in Anthurium. (B) Detailed information of photosynthesis pathway in KEGG database. (PDF 248 KB) [file 12864_2013_5516_MOESM8_ESM.pdf]

(A) Significantly enriched pathways of differentially expressed genes by 1-h cold stress in *Anthurium*

| Pathway                      | DEGs with pathway<br>annotation (721) | DEGs with pathway<br>annotation (721) | Pvalue   | Qvalue   | Pathway<br>ID |
|------------------------------|---------------------------------------|---------------------------------------|----------|----------|---------------|
| Photosynthesis               | 15 (2.08%)                            | 65 (0.45%)                            | 5.05E-07 | 5.65E-05 | ko00195       |
| Oxidative<br>phosphorylation | 22 (3.05%)                            | 214 (1.48%)                           | 0.001032 | 5.78E-02 | ko00190       |

(B)

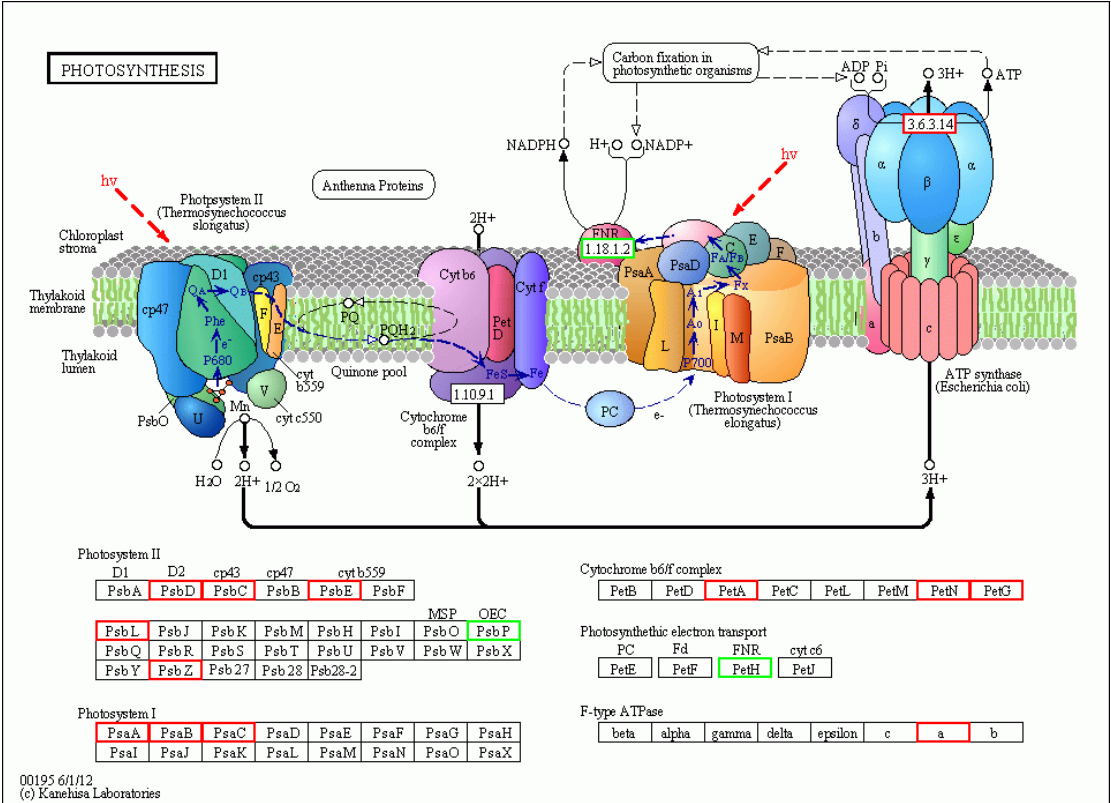

Detailed information of photosynthesis pathway in KEGG database. In the figure, up-regulated genes are marked with red borders while down-regulated genes are marked with green borders. Non-change genes are marked with black borders.
